# Supplementary material for: Stable cubic crystal structures and optimized thermoelectric performance of SrTiO3-based ceramics driven by entropy engineering
Source: Royal Society of Chemistry journal article supplement (doi:10.1039/d2ta06576b), 2022-01-01
Supplement: d2ta06576b1.pdf [file d2ta06576b1.pdf]

## Supporting information

### Stable cubic crystal structure and optimized thermoelectric performance of SrTiO<sub>3</sub> based ceramics driven by entropy engineering

Jie Yao, Tingting Chen, Hongxiang Wang, Mahwish Khan, Chang Tan, Yuqing Sun, Wenbin Su, Hongchao Wang,\* Chunlei Wang\*

*School of Physics, State Key Laboratory of Crystal Materials, Shandong University, Jinan, China*

\*Corresponding authors.

E-mail: [wanghc@sdu.edu.cn](mailto:wanghc@sdu.edu.cn) (H. Wang), [wangcl@sdu.edu.cn](mailto:wangcl@sdu.edu.cn) (C. Wang)

#### Calculation of Debye Temperature

The Debye temperature  $\theta_D$ , represents the characteristic energy scale of the crystal lattice, which can be obtained by the following equation:

$$\theta_D = \frac{h}{k_B} \left( \frac{6\pi^2 N}{V} \right)^{1/3} v_D \quad \backslash * \text{MERGEFORMAT (S1)}$$

$$\frac{1}{v_D^3} = \frac{1}{3} \left( \frac{1}{v_L^3} + \frac{2}{v_S^3} \right) \quad \backslash * \text{MERGEFORMAT (S2)}$$

where  $h$ ,  $k_B$ ,  $N$ ,  $V$ ,  $v_D$ ,  $v_L$  and  $v_S$  are Planck's constant, Boltzmann constant, number of atoms per unit volume, volume of the solid, mean velocity of sound, longitudinal and transverse sound velocity respectively. The longitudinal and transverse sound velocity are measured by ultrasonic pulse transmitter receiver (OLYMPUS 5073PR).

#### Fitting calculation of specific heat equation

A Scaematic drawing of  $C_p$  from 0 K to the sintering temperature is given in **Figure S1**. At lower temperatures, the variation of specific heat at constant pressure with temperature satisfies Debye's  $T^3$  law approximately, as shown in the following equation:

$$C_p \approx C_v = \frac{12}{5} \pi^4 N_A k_B \left( \frac{T}{\theta_D} \right)^3 \quad \text{\* MERGEFORMAT (S2)}$$

where  $N_A$ ,  $k_B$  and  $\theta_D$  are Avogadro's constant, Boltzmann constant and Debye temperature respectively. At higher temperatures, the  $C_p(T)$  were obtained by least squares fitting of the equation  $C_p = a + bT + cT^{-2} + dT^2$ .

### The calculation of disorder scattering parameter

The disorder scattering parameter ( $\Gamma_{\text{total}}$ ) is depended on the mass fluctuation ( $\Gamma_m$ ) and strain field term ( $\Gamma_s$ ), as given by  $\Gamma_{\text{total}} = \Gamma_m + \Gamma_s$ . The mass fluctuation ( $\Gamma_m$ ) and strain field term ( $\Gamma_s$ ) parameter are then given by

$$\Gamma_m = \frac{\sum_{i=1}^n c_i \left( \frac{\bar{M}_i}{\bar{M}} \right)^2 f_i^1 f_i^2 \left( \frac{M_i^1 - M_i^2}{\bar{r}_i} \right)}{\left( \sum_{i=1}^n c_i \right)} \quad \text{and} \quad \Gamma_s = \frac{\sum_{i=1}^n c_i \left( \frac{\bar{M}_i}{\bar{M}} \right)^2 f_i^1 f_i^2 \varepsilon \left( \frac{r_i^1 - r_i^2}{\bar{r}_i} \right)}{\left( \sum_{i=1}^n c_i \right)},$$

where  $\bar{M}_i$  is the average atomic mass of the  $i$  of sublattice, the  $\bar{M}$  is the average atomic mass of the compound,  $f_i$  is the fractional occupant,  $r_i$  is the radius of atom,  $\varepsilon$  is the phenomenological parameter which is a function of the Grüneisen parameter.

The mass fluctuation term and the strain field term would be jointly determined by four or five parameters of  $\bar{M}_i$ ,  $\bar{M}$ ,  $f_i$ ,  $r_i$ ,  $\varepsilon$ , respectively.

**Table S1.** The values of  $a$ ,  $b$ ,  $c$ ,  $d$ ,  $\Delta H_{298}^{\theta}$ ,  $v_L$ ,  $v_S$  and  $\theta_D$  of  $\text{Sr}_{0.9-x}\text{Ba}_x\text{La}_{0.1}\text{Ti}_{0.9}\text{Nb}_{0.1}\text{O}_{3-\delta}$  samples.

| Component $x$ | $a$   | $b$   | $c$   | $d$    | $\Delta H_{298}^{\theta}$<br>(kJ / mol) | $v_L$<br>(m/s) | $v_S$<br>(m/s) | $\theta_D$<br>(K) |
|---------------|-------|-------|-------|--------|-----------------------------------------|----------------|----------------|-------------------|
| $x = 0.1$     | 96.21 | 37.99 | -0.39 | 15.35  | -1555.47                                | 6769           | 4235           | 595               |
| $x = 0.2$     | 88.65 | 50.07 | -0.36 | 7.38   | -1562.42                                | 6676           | 4111           | 576               |
| $x = 0.3$     | 89.23 | 48.67 | -0.36 | 15.72  | -1569.36                                | 6667           | 4455           | 617               |
| $x = 0.4$     | 88.62 | 69.50 | -0.36 | -11.32 | -1576.28                                | 6417           | 3972           | 551               |
| $x = 0.5$     | 96.52 | 47.42 | -0.39 | 12.03  | -1583.19                                | 6304           | 4238           | 577               |

**Table S2.** Lattice constant ( $a$ ), experimental density ( $\rho_1$ ) and relative density ( $\rho_2$ ) of  $\text{Sr}_{0.9-x}\text{Ba}_x\text{La}_{0.1}\text{Ti}_{0.9}\text{Nb}_{0.1}\text{O}_{3-\delta}$  samples.

| Component $x$ | $a$ (Å) | $\rho_1$ (g/cm <sup>3</sup> ) | $\rho_2$ (%) |
|---------------|---------|-------------------------------|--------------|
| $x = 0.1$     | 3.9290  | 5.171                         | 95.3         |
| $x = 0.2$     | 3.9341  | 5.228                         | 94.4         |
| $x = 0.3$     | 3.9491  | 5.333                         | 95.0         |
| $x = 0.4$     | 3.9593  | 5.355                         | 93.9         |
| $x = 0.5$     | 3.9664  | 5.310                         | 91.5         |

The relative density is calculated by

$$\text{Relative density} = \frac{\text{Experimental density}}{\text{Theoretical density}} \times 100\%.$$

As listed in **Table S2**, experimental densities of  $\text{Sr}_{0.9-x}\text{Ba}_x\text{La}_{0.1}\text{Ti}_{0.9}\text{Nb}_{0.1}\text{O}_{3-\delta}$  fluctuate around 5.2-5.3g/cm<sup>3</sup>. And since the mass of Ba is much higher than that of Sr, the theoretical density of Ba doped samples increases. Finally, the relative density shows a decreasing trend with the increase of Ba amount.

**Table S3.** Parameters for calculation of lattice thermal conductivity of  $\text{Sr}_{0.9-x}\text{Ba}_x\text{La}_{0.1}\text{Ti}_{0.9}\text{Nb}_{0.1}\text{O}_{3-\delta}$  through Debye-Callaway model. D is the average grain size obtained by Nano Measurer.

| Component $x$ | $\theta_D$<br>(K) | $v_D$<br>(m/s) | D<br>( $\mu\text{m}$ ) | A<br>( $\text{s}^3$ )  | B<br>( $\text{s}\cdot\text{K}^{-1}$ ) | C<br>(s)              | $\beta$ |
|---------------|-------------------|----------------|------------------------|------------------------|---------------------------------------|-----------------------|---------|
| $x = 0.1$     | 595               | 4664           | 0.69                   | $2.19 \times 10^{-42}$ | $1.22 \times 10^{-19}$                | $1.0 \times 10^{-18}$ | 11      |
| $x = 0.2$     | 576               | 4535           | 0.8                    | $2.44 \times 10^{-42}$ | $1.45 \times 10^{-19}$                | $1.0 \times 10^{-18}$ | 10.9    |
| $x = 0.3$     | 617               | 4869           | 0.84                   | $1.85 \times 10^{-42}$ | $6.58 \times 10^{-20}$                | $7.7 \times 10^{-17}$ | 26      |
| $x = 0.4$     | 551               | 4380           | 0.105                  | $2.64 \times 10^{-42}$ | $1.52 \times 10^{-19}$                | $8.0 \times 10^{-17}$ | 10.5    |
| $x = 0.5$     | 577               | 4628           | 0.148                  | $2.04 \times 10^{-42}$ | $7.23 \times 10^{-20}$                | $1.1 \times 10^{-16}$ | 32.1    |

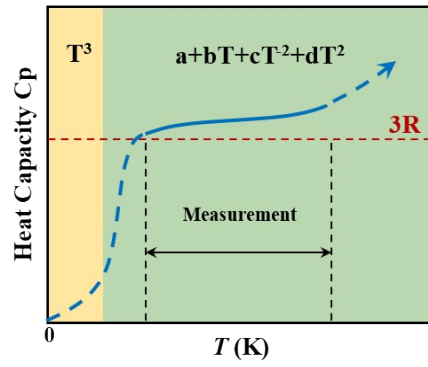

**Fig. S1** Schematic drawing of the specific heat capacity of an ideal model from 0 K to the sintering temperature with no phase transition over the whole temperature range.

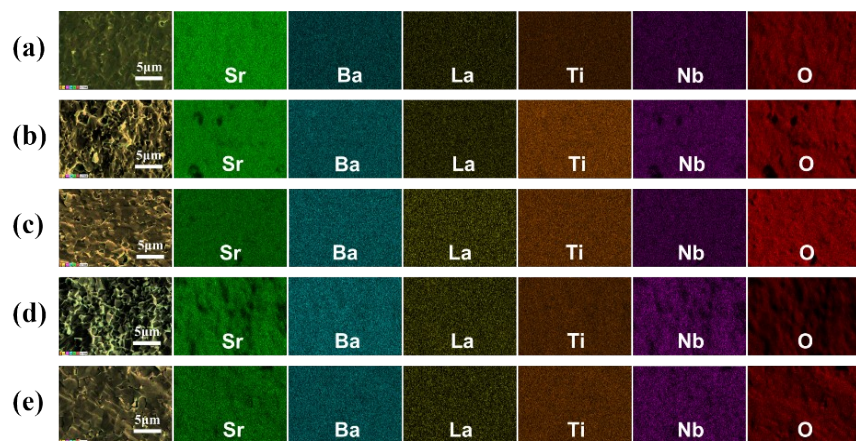

**Fig. S2** The EDS mapping of  $\text{Sr}_{0.9-x}\text{Ba}_x\text{La}_{0.1}\text{Ti}_{0.9}\text{Nb}_{0.1}\text{O}_{3-\delta}$  samples: (a)  $x = 0.1$ ; (b)  $x = 0.2$ ; (c)  $x = 0.3$ ; (d)  $x = 0.4$ ; (e)  $x = 0.5$ .

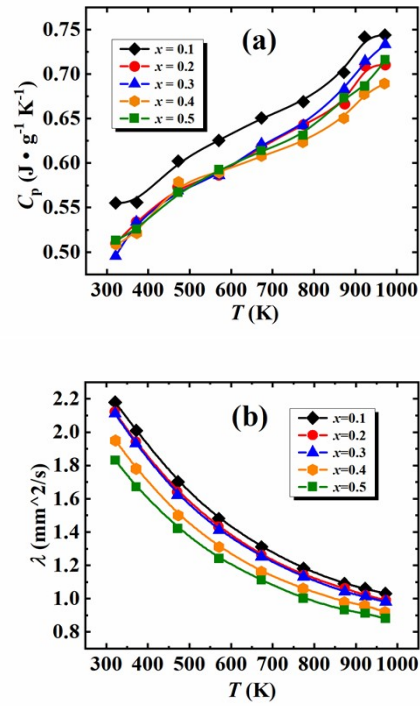

**Fig. S3** Temperature dependence of the thermal transport properties for  $\text{Sr}_{0.9-x}\text{Ba}_x\text{La}_{0.1}\text{Ti}_{0.9}\text{Nb}_{0.1}\text{O}_{3-\delta}$  samples: (a) specific heat capacity; (b) thermal diffusion coefficient.



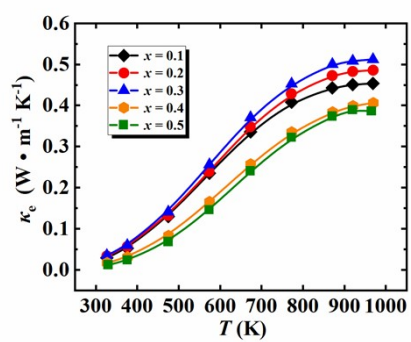

**Fig. S4** Temperature dependence of electronic thermal conductivity for  $\text{Sr}_{0.9-x}\text{Ba}_x\text{La}_{0.1}\text{Ti}_{0.9}\text{Nb}_{0.1}\text{O}_{3-\delta}$  samples.

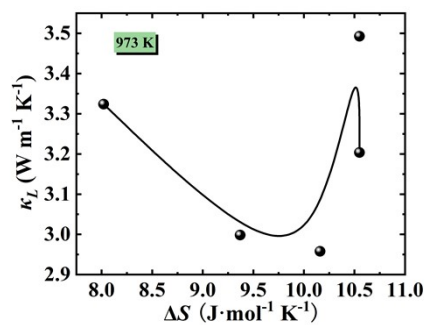

**Fig. S5** Lattice thermal conductivity depended on configurational entropy for Sr<sub>0.9-</sub>  
<sub>x</sub>Ba<sub>x</sub>La<sub>0.1</sub>Ti<sub>0.9</sub>Nb<sub>0.1</sub>O<sub>3- $\delta$</sub>  samples ( $x = 0.1, 0.2, 0.3, 0.4, 0.5$ ) at 973 K.
